# Supplementary material
Source: PubMed Central journal article supplement (PMC9448735)
Supplement: 41467_2022_32783_MOESM1_ESM.pdf [file 41467_2022_32783_MOESM1_ESM.pdf]

# **Molecular insights into antibody-mediated protection against the prototypic simian immunodeficiency virus**

Fangzhu Zhao, Zachary T. Berndsen, Nuria Pedreño-Lopez, Alison Burns, Joel D. Allen, Shawn Barman, Wen-Hsin Lee, Srirupa Chakraborty, Sandrasegaram Gnanakaran, Leigh M. Sewall, Gabriel Ozorowski, Oliver Limbo, Ge Song, Peter Yong, Sean Callaghan, Jessica Coppola, Kim L. Weisgrau, Jeffrey D. Lifson, Rebecca Nedellec, Thomas B Voigt, Fernanda Laurino, Johan Louw, Brandon C. Rosen, Michael Ricciardi, Max Crispin, Ronald C. Desrosiers, Eva G. Rakasz, David I. Watkins, Raiees Andrabi\*, Andrew B. Ward\*, Dennis R. Burton\*, Devin Sok\*

\*Corresponding authors: Email: [andrabi@scripps.edu](mailto:andrabi@scripps.edu); [andrew@scripps.edu](mailto:andrew@scripps.edu); [burton@scripps.edu](mailto:burton@scripps.edu); [dsok@iavi.org](mailto:dsok@iavi.org)

**This PDF file includes:**

**Supplementary Figures 1-7**

**Supplementary Table 1-4**

**a**

| Rhesus ID | SIVmacE5  |                 | HIV-2<br>7312A | SIVcpzPtt | HIV<br>BG505<br>N332 | MLV | Neut Titer<br>(1/dilution) |
|-----------|-----------|-----------------|----------------|-----------|----------------------|-----|----------------------------|
|           | SIVmac239 | 43 (Mol. Clone) |                |           |                      |     |                            |
| r11039    | 5,385     | 107,423         | 131,961        | <50       | <50                  | <50 | 1,000                      |
| r10027    | 169       | 73,260          | 8,945          | <50       | <50                  | <50 | 5,000                      |
| r11008    | 1,562     | 21,777          | 52,882         | <50       | <50                  | <50 | 20000                      |
| r11002    | 2,061     | 35,398          | 6,653          | <50       | <50                  | <50 | 50000                      |
| r04161    | 351       | >150,000        | 7,348          | <50       | <50                  | <50 | 100,000                    |
| r10014    | 213       | 21,372          | 4,819          | <50       | <50                  | <50 |                            |
| r03145    | 3,717     | 38,850          | 2,486          | <50       | <50                  | <50 |                            |
| r10051    | 3,377     | NT              | NT             | NT        | NT                   | <50 |                            |
| rhBB35    | 676       | NT              | NT             | NT        | NT                   | <50 |                            |
| r10055    | 672       | NT              | NT             | NT        | NT                   | <50 |                            |
| r01007    | 4,101     | NT              | NT             | NT        | NT                   | NT  |                            |
| r09004    | 325       | NT              | NT             | NT        | NT                   | NT  |                            |
| Rh32888   | <30       | NT              | NT             | NT        | NT                   | <30 |                            |
| Rh34118   | <30       | NT              | NT             | NT        | NT                   | <30 |                            |
| Rh31186   | <30       | NT              | NT             | NT        | NT                   | <30 |                            |
| Rh33519   | <30       | NT              | NT             | NT        | NT                   | <30 |                            |
| Rh34620   | <30       | NT              | NT             | NT        | NT                   | <30 |                            |

**b**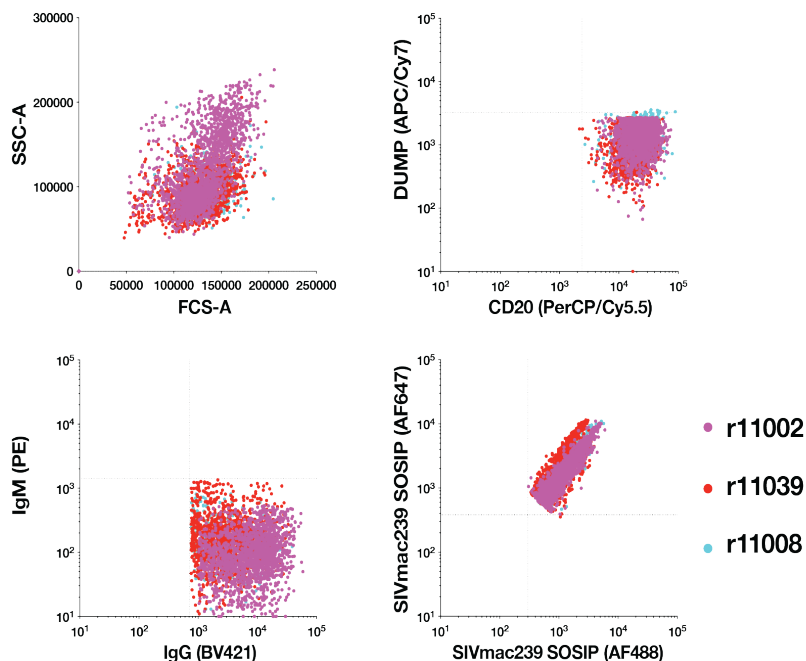**c**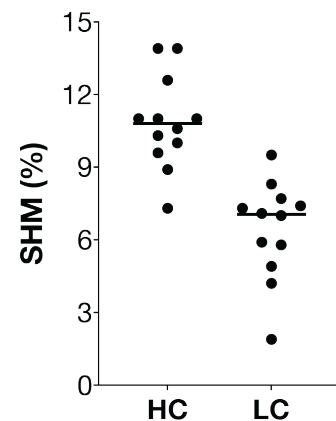

**Supplementary Fig.1. Rhesus plasma neutralization titers and FACS sorting of PBMCs from 3 animals. Related to Figure 1. a**, Neutralization profile of plasma from SIVmac239 infected rhesus macaques against a panel of pseudoviruses including rhesus macaque SIV (SIVmac239, SIVmacE543), an HIV-2 (HIV-2.7312A), a chimpanzee SIV (SIVcpzPtt), an HIV-1 (BG505), and MLV as a control, showing the ID<sub>50</sub> of plasma against each virus. N/T: not tested. **b**, Index analysis of single-cell sorted CD20<sup>+</sup>IgM<sup>+</sup> IgG<sup>+</sup>SIVmac239 SOSIP<sup>++</sup> population from the PBMCs of r11002 (pink), r11008 (red), and r11039 (cyan). **c**, Somatic hypermutation (SHM) rates of isolated SIVmac239 mAbs at the nucleotide level.

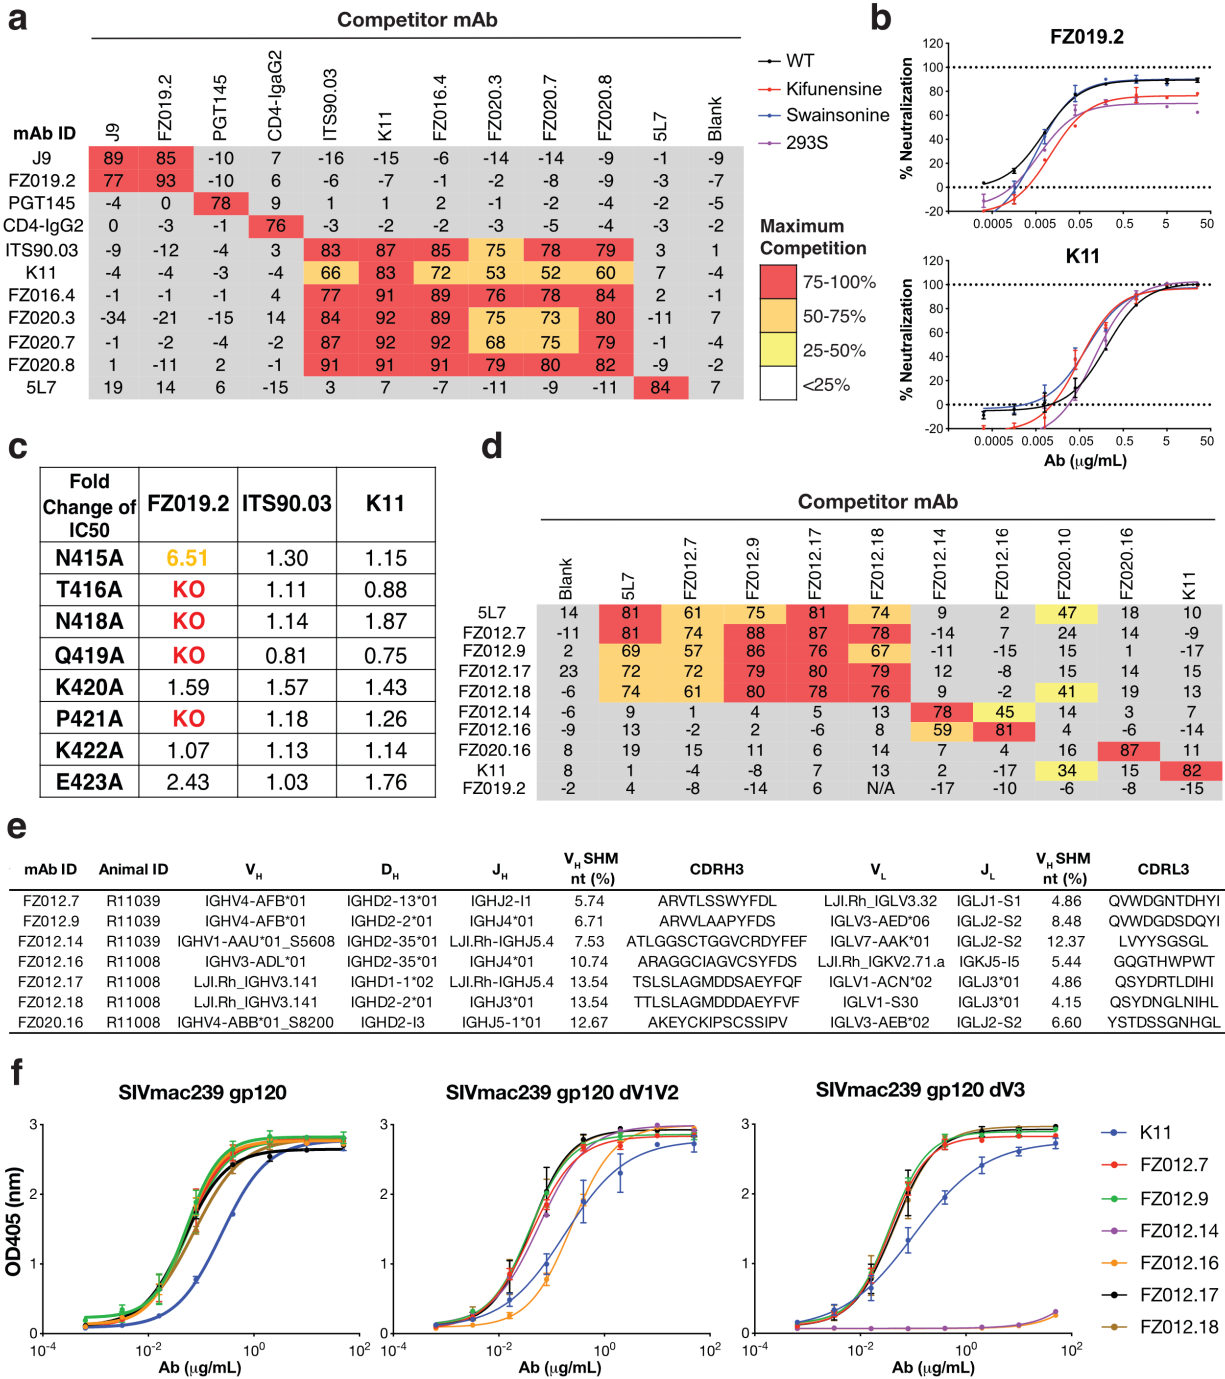

**Supplementary Fig.2. Characterization of SIVmac239 nAb and non-nAb epitope specificities. Related to Figure 2 and Figure 3. a, ELISA competition between SIVmac239 nAbs, a SIVmac239 non-nAb 5L7, an HIV-1 bnAb PGT145, and CD4-IgG2 for binding to SIVmac239 SOSIP.664. Maximum percentage of competition was colored**

according to the key. **b**, Representative neutralization curves of FZ019.2 and K11 against wildtype SIVmac239 virus, 293S-generated virus, and glycosidase inhibitor-treated viruses at the following concentrations: 25  $\mu$ M kifunensine and 20  $\mu$ M swainsonine, respectively. Data are presented as mean values  $\pm$  SD, and error bars are from two technical replicates. **c**, Fold reduction of neutralization potency against alanine-scan variants at the V4 loop relative to wild type SIVmac239 pseudovirus. KO: knockout of neutralization i.e. no neutralization measured at 50  $\mu$ g/mL of mAbs. **d**, ELISA competition between SIVmac239 non-nAbs, 5L7, as well as nAbs K11 and FZ019.2 for binding to SIVmac239 SOSIP.664. Maximum percentage of competition was colored according to the key. **e**, Immunogenetics of SIVmac239 non-nAb mAbs. Rhesus mAbs were annotated with a new rhesus germline database<sup>60</sup>. **f**, Representative ELISA binding curves of non-nAbs binding to SIVmac239 gp120, gp120 dV1V2, and gp120 dV1V2V3. Antibodies were colored according to the key. Data are presented as mean values  $\pm$  SD, and error bars are from two technical replicates. Data are representative for at least two independent experiments.

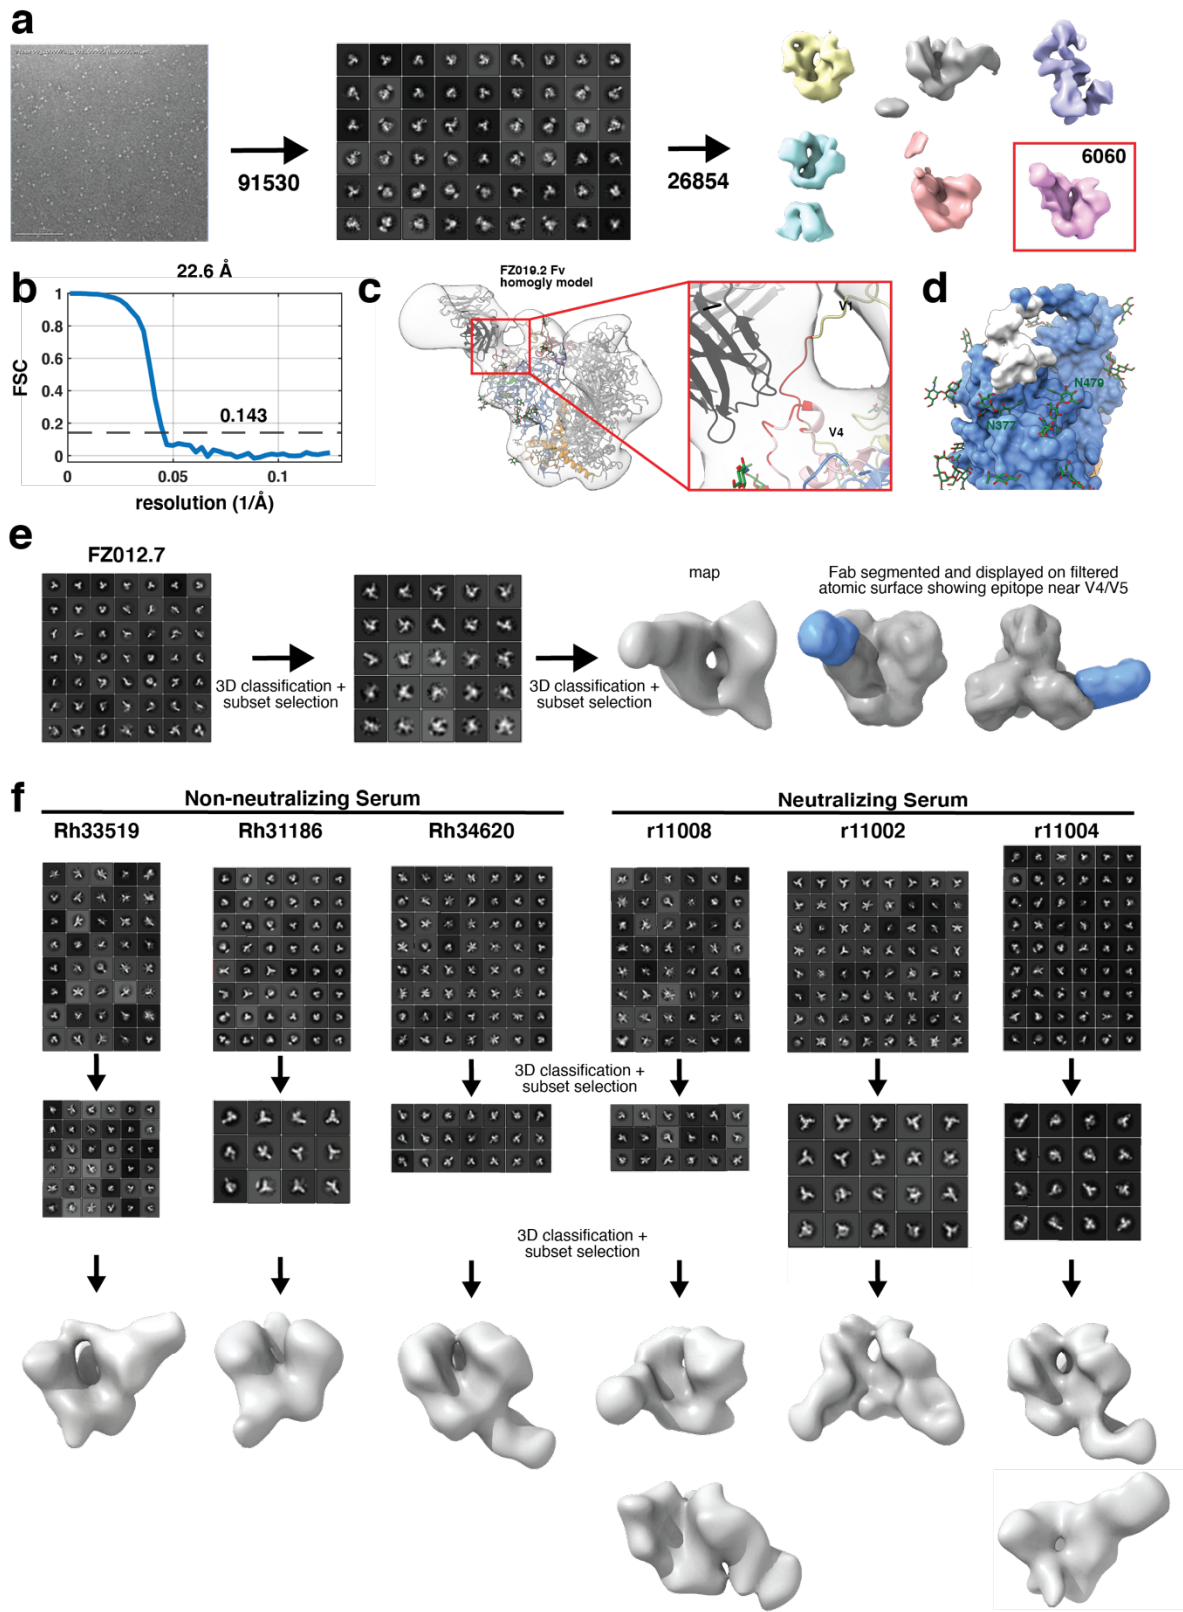

**Supplementary Fig.3. NSEM data processing workflows all mAb and polyclonal data. Related to Figure 1 and Figure 2.** **a**, Data processing workflow for FZ019.2 Fab bound to SIVmac239 SOSIP showing a representative raw micrograph along with 2-D and 3-D class averages and particle numbers indicated at each step. **b**, Fourier Shell Correlation plot for the final 3-D reconstruction. **c**, FZ019.2 epitope mapping using the cryo-EM structure and homology model of the Fab showing potential epitope residues located in the V1 and V4 loops colored in red. **d**, Molecular surface representation of SIVmac239 gp120 showing FZ019.2 epitope in white. **e**, Data processing workflow for FZ012.7 bound to the SIVmac239 trimer along with a segmentation of the Fab displayed on a molecular surface representation of the SIVmac239 trimer structure. **f**, Data processing workflow for all polyclonal samples tested.

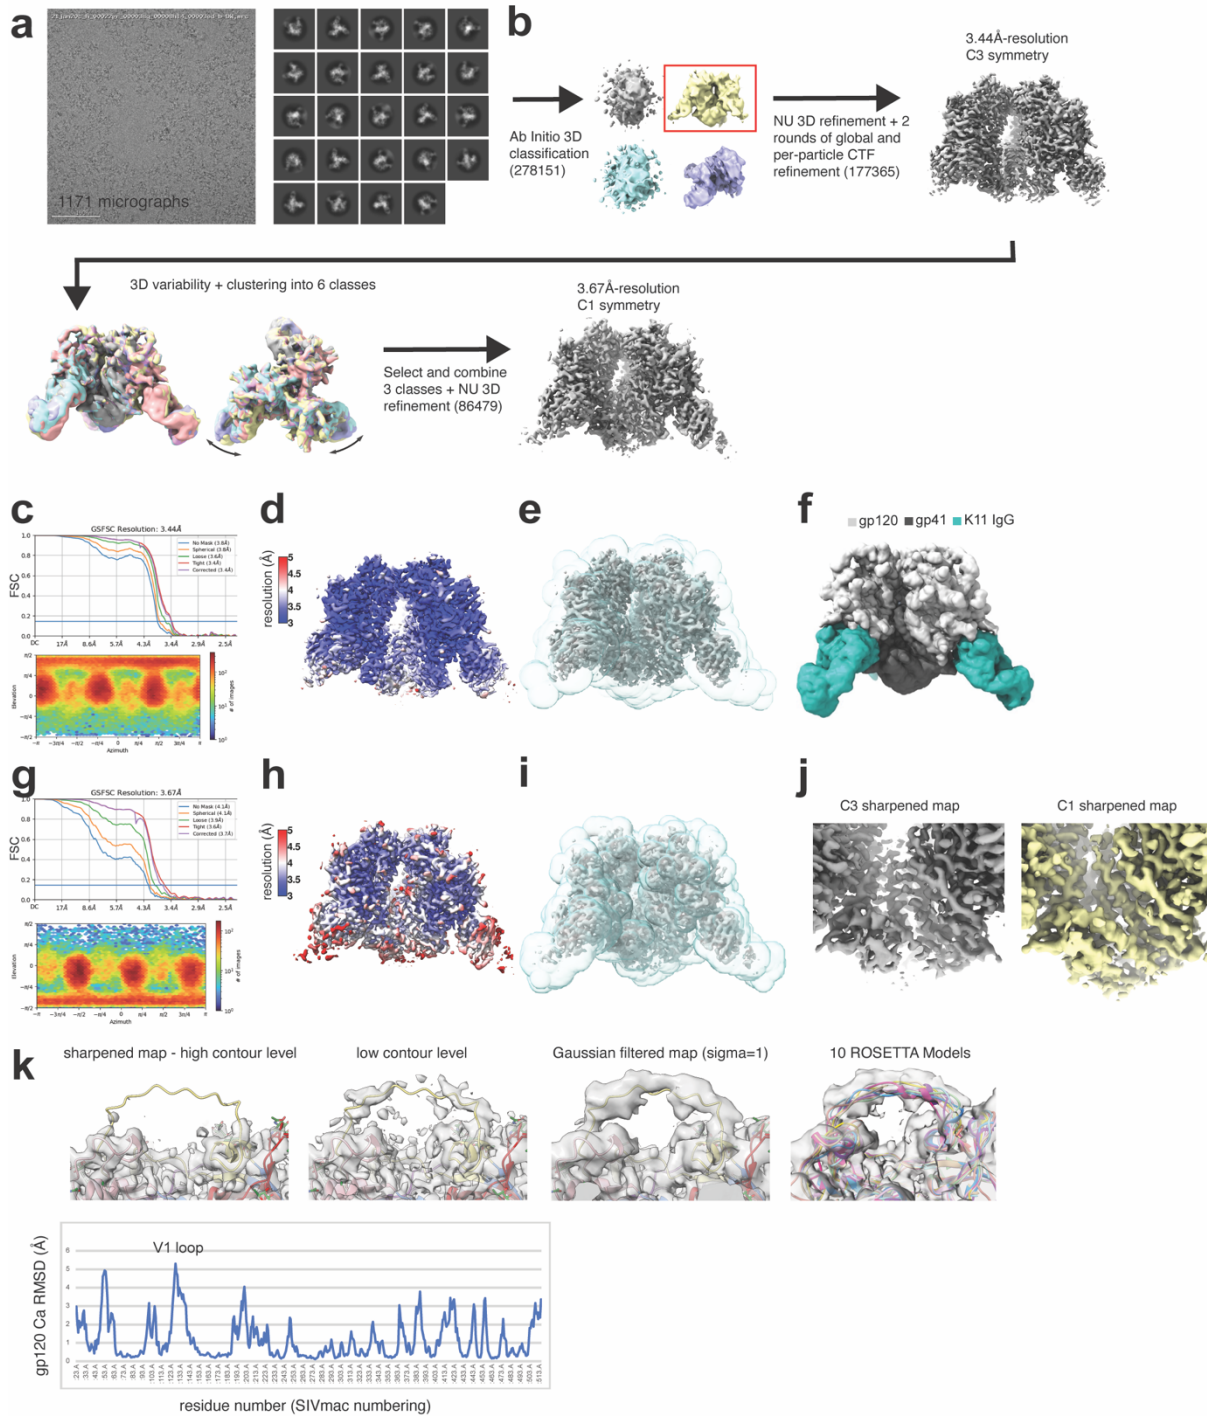

**Supplementary Fig.4. Cryo-EM data processing workflow. Related to Figure 4. a,** Raw micrograph and representative 2-D class averages for the SIVmac239.K180S + K11 IgG cryo-EM dataset. **b,** 3-D data processing workflow showing sorting by *ab initio* classification and 3-D variability analysis resulting in a C3 consensus refinement and

asymmetric refinement from 3D variability clusters. **c**, Fourier Shell Correlation and angular distribution plots for the C3 consensus refinement. **d**, Local resolution analysis, **e**, mask used for refinement, and **f**, final segmented map. **g-i**, Same as **c-d** but for asymmetric refinement. **j**, Close up view of map density corresponding to gp41 in the C3 symmetric and asymmetric maps showing more ordering in the asymmetric pose. **k**, Close up views of the extended V1 loop segment between residues ~127-139 showing map density in the 3.4Å sharpened map and a Gaussian filtered map (sigma=1) at high and low contour levels along the refined atomic model and the top 10 scoring models from ROSETTA fragment-based refinement. Shown below is the alpha carbon RMSD for 100 ROSETTA models with the extended V1 loop labeled.



**a** ■ delta V1/V2 gp120 monomer crystal structure (6TYB)

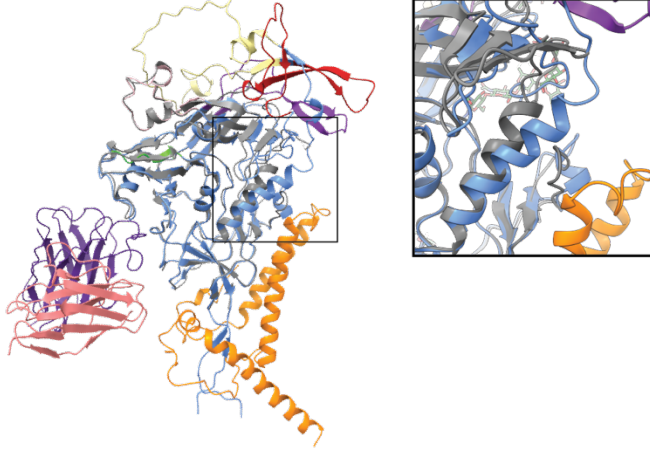

**b** all atom RMSD

|                 | BG505 (HIV-1) | MT145K (SIVcpz) | SIVmac239 |
|-----------------|---------------|-----------------|-----------|
| BG505 (HIV-1)   | 0             | 8.11            | 9.79      |
| MT145K (SIVcpz) |               | 0               | 9.33      |
| SIVmac239       |               |                 | 0         |

complete monomer

|                 | BG505 (HIV-1) | MT145K (SIVcpz) | SIVmac239 |
|-----------------|---------------|-----------------|-----------|
| BG505 (HIV-1)   | 0             | 8.56            | 10.58     |
| MT145K (SIVcpz) |               | 0               | 10.17     |
| SIVmac239       |               |                 | 0         |

gp120 only

|                 | BG505 (HIV-1) | MT145K (SIVcpz) | SIVmac239 |
|-----------------|---------------|-----------------|-----------|
| BG505 (HIV-1)   | 0             | 6.06            | 5.59      |
| MT145K (SIVcpz) |               | 0               | 4.77      |
| SIVmac239       |               |                 | 0         |

gp41 only

**c** □ MT145K (SIVcpz)  
■ BG505 (HIV-1)

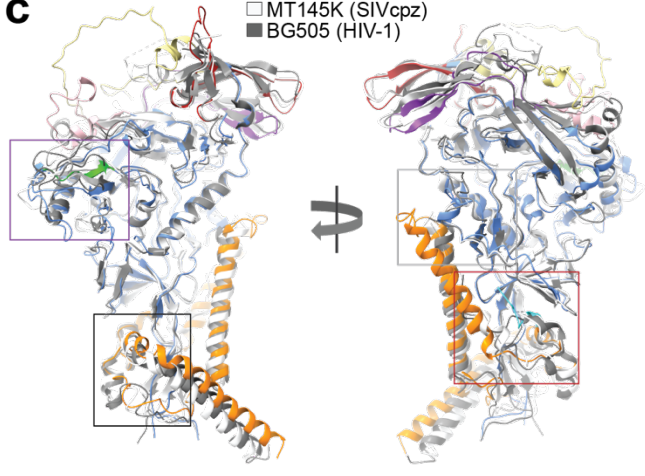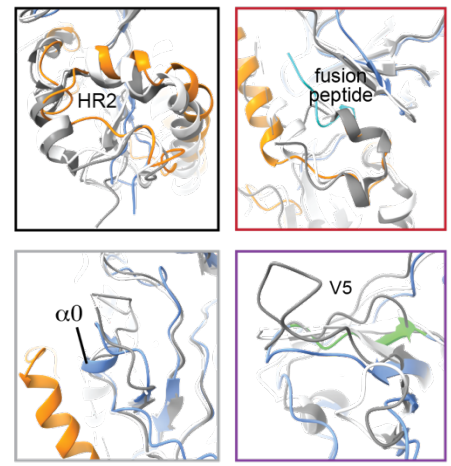

**d** BG505 SOSIP (HIV-1)      MT145K SOSIP(SIVcpz)      SIVmac239 SOSIP

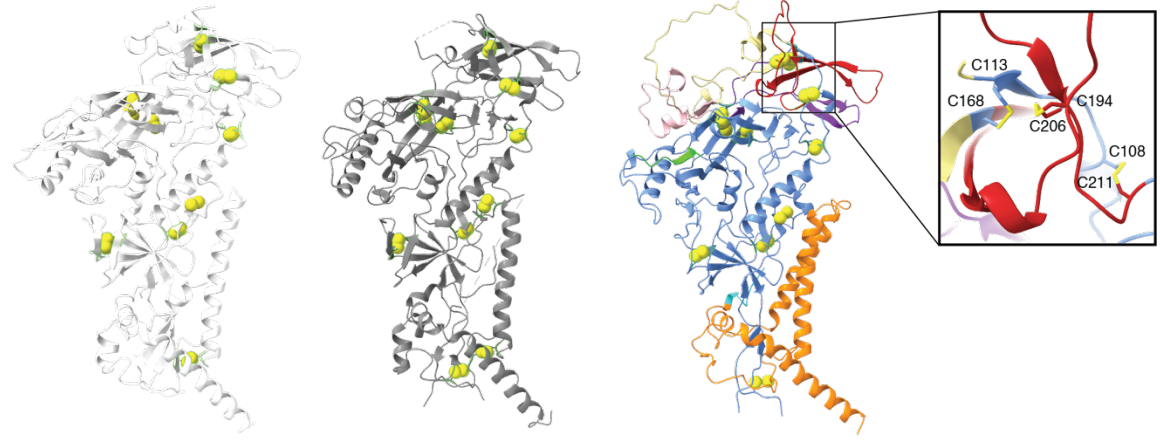

**Supplementary Fig.5. Extended structural analysis. Related to Figure 4.** **a**, Alignment of our cryo-EM structure with the delta V1/V2 gp120 monomer crystal structure (PDB: 6TYB) showing close agreement outside of the trimerization and gp120-gp41 interfaces (close-up view). **b**, All atom root mean squared deviations (RMSD) between all three structures. **c**, Two views of the SIVmac239 monomer with MT145K SIVcpz and BG505 SOSIP.664 HIV-1 Env structures overlayed and aligned to gp120. Coloring the same as Figure 4. Close up views from designated regions in panel A with higher levels of structural variability between the three models. Specifically, the HR2 helical turn, fusion peptide, alpha 0, and V5 loop. **d**, Detected (highlighted in green) and probable (not highlighted) disulfide bonds for all three models. Close up of the base of V1 and V2 loops showing the additional disulfide unique to SIVmac239.

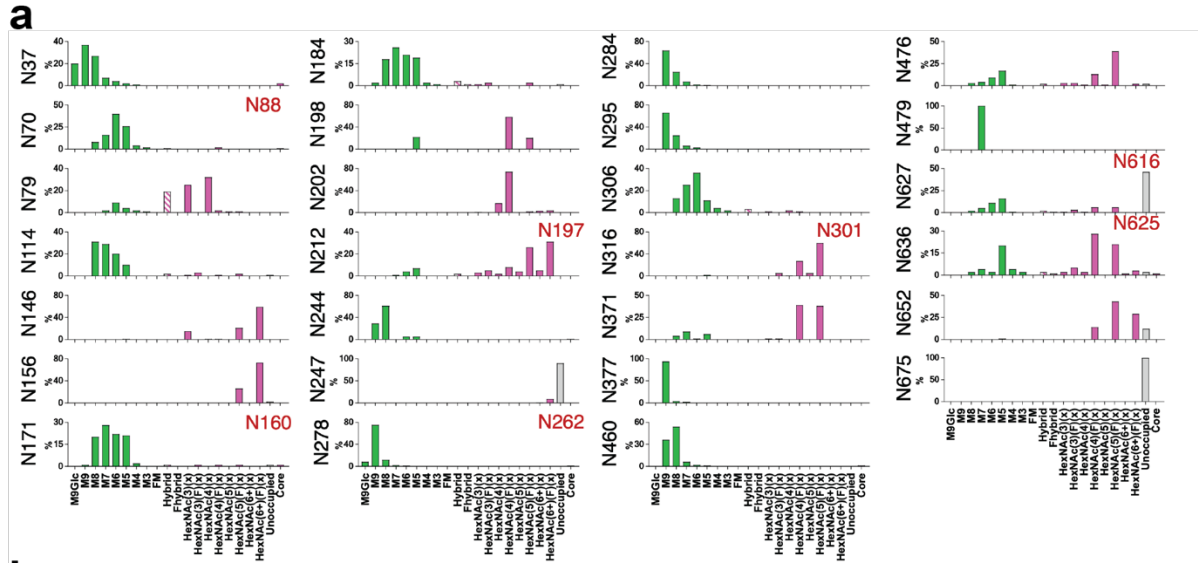

**b**

|              | N37 | N70 | N79 | N114 | N146 | N156 | N171 | N184 | N198 | N202 | N212 | N244 | N247 | N278 | N284 | N295 | N306 | N316 | N371 | N377 | N460 | N476 | N479 | N627 | N636 | N652 | N675 |
|--------------|-----|-----|-----|------|------|------|------|------|------|------|------|------|------|------|------|------|------|------|------|------|------|------|------|------|------|------|------|
| Oligomannose | 97  | 95  | 18  | 90   | 2    | 0    | 95   | 89   | 22   | 0    | 13   | 99   | 0    | 99   | 100  | 100  | 91   | 2    | 21   | 100  | 98   | 34   | 100  | 35   | 33   | 1    | 0    |
| Hybrid       | 0   | 1   | 20  | 2    | 0    | 0    | 1    | 4    | 0    | 0    | 2    | 0    | 0    | 0    | 0    | 0    | 3    | 0    | 0    | 0    | 0    | 2    | 0    | 2    | 3    | 0    | 0    |
| Complex      | 3   | 4   | 62  | 6    | 98   | 98   | 4    | 5    | 78   | 100  | 85   | 1    | 10   | 1    | 0    | 0    | 6    | 98   | 79   | 0    | 2    | 62   | 0    | 16   | 62   | 87   | 0    |
| Unoccupied   | 0   | 0   | 0   | 1    | 0    | 2    | 1    | 1    | 0    | 0    | 0    | 0    | 90   | 0    | 0    | 0    | 0    | 0    | 0    | 0    | 0    | 2    | 0    | 46   | 2    | 12   | 100  |
| Fucose       | 0   | 3   | 4   | 5    | 81   | 98   | 2    | 5    | 78   | 79   | 70   | 0    | 9    | 0    | 0    | 0    | 2    | 93   | 79   | 0    | 0    | 58   | 0    | 15   | 58   | 87   | 0    |
| NeuAc        | 0   | 0   | 7   | 0    | 47   | 2    | 0    | 0    | 0    | 25   | 14   | 0    | 0    | 0    | 0    | 0    | 1    | 23   | 13   | 0    | 0    | 11   | 0    | 9    | 10   | 21   | 0    |
| Sulfated     | 0   | 0   | 0   | 0    | 0    | 0    | 0    | 0    | 0    | 0    | 4    | 0    | 10   | 0    | 0    | 0    | 0    | 0    | 0    | 0    | 0    | 0    | 0    | 0    | 1    | 3    | 0    |

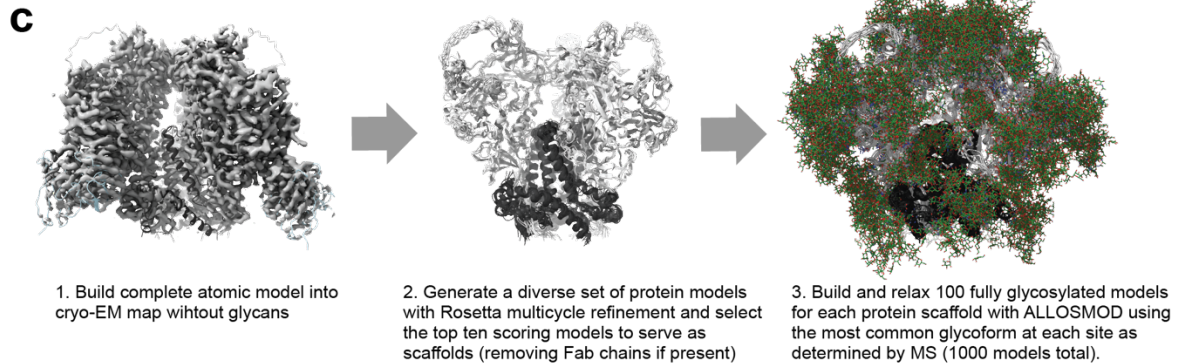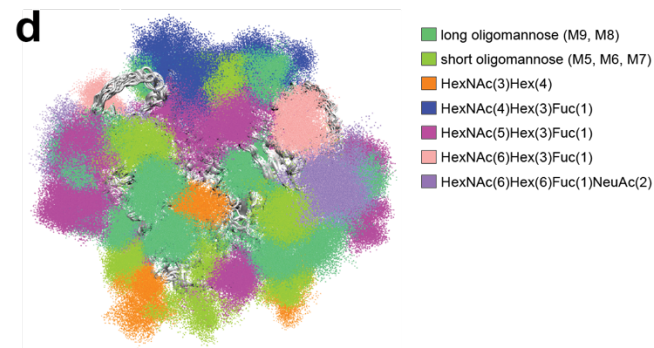

**Supplementary Fig.6. Extended glycan shield analysis. Related to Figure 5. a,** Complete site-specific MS analysis showing the distribution of specific glycoforms for each PNGS along with gross percentages of each type of glycan **b. c,** Schematic overview of the modified HTAM pipeline using the cryo-EM map to guide the generation of protein scaffolds for subsequent glycan modeling. **d,** All fully glycosylated models aligned to one another with glycans colored according to their type designated in the legend.

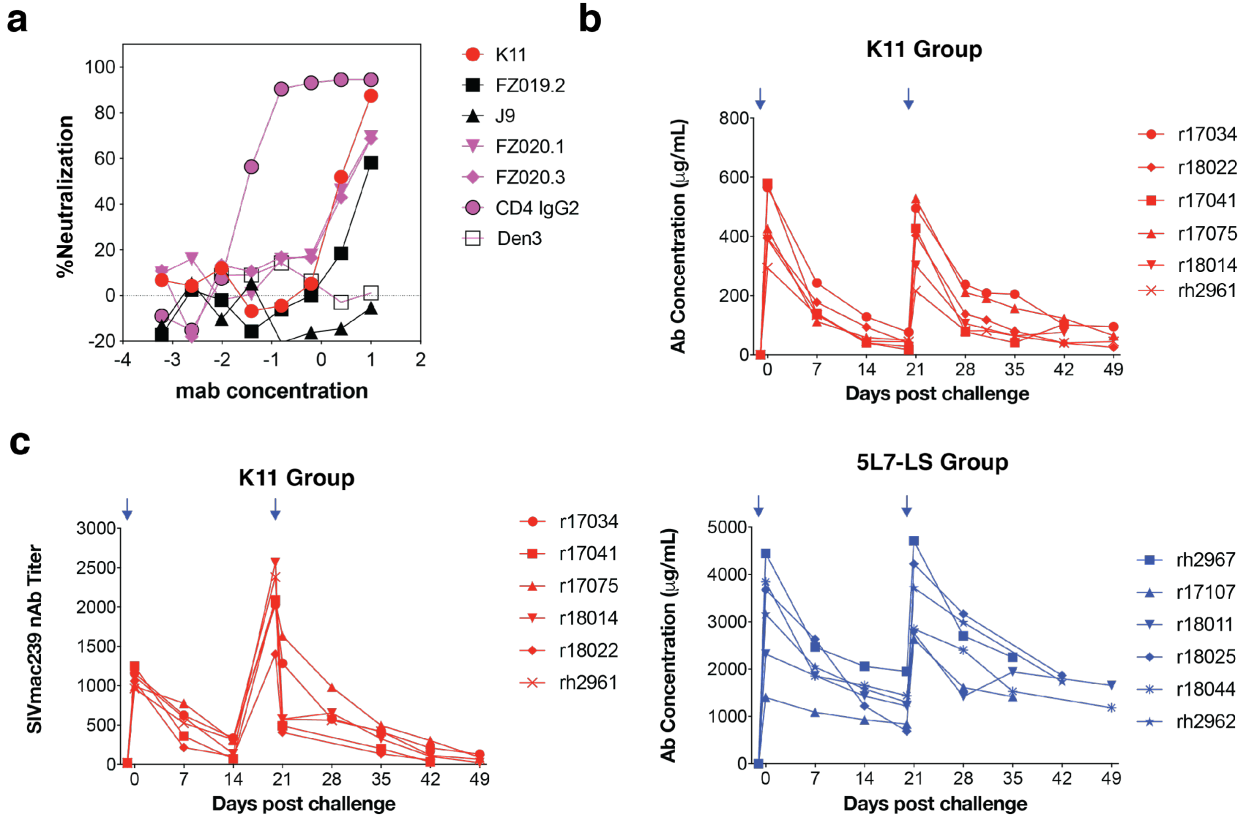

**Supplementary Fig.7. Macaque challenge study details. Related to Figure 6. a,** Neutralization curves of K11 and FZ019.2 against SIVmac239 challenge virus. CD4-IgG2 was the positive control and Den3 was negative control. Antibodies are colored according to the key. **b,** Plasma antibody concentrations in the K11 group (top) and 5L7-LS group (bottom). Rhesus plasma 5L7 was measured by ELISA binding to the C9 tag on the 5L7-LS antibody whereas K11 was measured by ELISA binding to SIVmac239 gp140 FT. Arrow represents antibody infusion. **c,** Plasma SIVmac239 nAb titers in the K11 group. Data are representative for two independent experiments.

**Supplementary Table 1. Mapping SIVmac239 mAb binding specificities by ELISA.**

| mAb ID          | Animal ID | SIVmac239 ELISA Binding EC <sub>50</sub> (µg/mL) |          |            |       |             |           |
|-----------------|-----------|--------------------------------------------------|----------|------------|-------|-------------|-----------|
|                 |           | SOSIP                                            | gp140 FT | FT dV1V2V3 | gp120 | gp120 dV1V2 | gp120 dV3 |
| K11             | r11008    | 0.529                                            | 0.100    | 0.066      | 0.109 | 0.055       | 0.068     |
| FZ012.15        | r11008    | 0.611                                            | 0.077    | 0.037      | 0.058 | 0.036       | 0.062     |
| FZ020.1         | r11008    | 0.337                                            | 0.063    | 0.044      | 0.045 | 0.034       | 0.053     |
| FZ020.3         | r11008    | 0.226                                            | 0.031    | 0.042      | 0.034 | 0.036       | 0.053     |
| FZ020.5         | r11008    | 1.799                                            | 0.092    | 0.023      | 0.099 | 0.067       | 0.127     |
| FZ016.3         | r11002    | 1.130                                            | 0.050    | 0.028      | 0.070 | 0.088       | 0.245     |
| FZ016.4         | r11002    | 0.411                                            | 0.033    | 0.022      | 0.039 | 0.040       | 0.089     |
| FZ016.5         | r11002    | 0.669                                            | 0.047    | 0.027      | 0.048 | 0.070       | 0.176     |
| FZ020.7         | r11002    | 0.923                                            | 0.042    | 0.022      | 0.067 | 0.079       | 0.113     |
| FZ020.8         | r11002    | 0.958                                            | 0.040    | 0.021      | 0.064 | 0.064       | 0.109     |
| FZ019.2         | r11039    | 0.334                                            | 0.527    | >50        | 2.752 | >50         | 1.159     |
| J9              | r11039    | 0.084                                            | 1.158    | >50        | N/A   | >50         | N/A       |
| <b>ITS90.03</b> | N/A       | 0.289                                            | 0.047    | 0.043      | 0.028 | 0.022       | 0.040     |

**Supplementary Table 2. SIVmac239 Env 15-mer overlapping peptide sequences.**

| <b>Epitope</b> | <b>Biotinylated Peptide ID</b> | <b>Sequence</b>  | <b>Epitope</b> | <b>Biotinylated Peptide ID</b> | <b>Sequence</b>  |
|----------------|--------------------------------|------------------|----------------|--------------------------------|------------------|
| V1V2           | SIVmac239_Env_Peptide1         | NKSETDRWGLTKSIT  | gp41           | SIVmac239_Env_Peptide39        | GVFVLGFLGFLATAG  |
| V1V2           | SIVmac239_Env_Peptide2         | DRWGLTKSITTTAST  | gp41           | SIVmac239_Env_Peptide40        | GFLGFLATAGSAMGA  |
| V1V2           | SIVmac239_Env_Peptide3         | TKSITTTASTTSTTA  | gp41           | SIVmac239_Env_Peptide41        | LATAGSAMGAASLTL  |
| V1V2           | SIVmac239_Env_Peptide4         | TTASTTSTTASAKVD  | gp41           | SIVmac239_Env_Peptide42        | SAMGAASLTLTAQSR  |
| V1V2           | SIVmac239_Env_Peptide5         | TSTTASAKVDMVNET  | gp41           | SIVmac239_Env_Peptide43        | ASLTLTAQSRTLLAG  |
| V1V2           | SIVmac239_Env_Peptide6         | SAKVDMVNETSSCIA  | gp41           | SIVmac239_Env_Peptide44        | TAQSRTLLAGIVQQQ  |
| V1V2           | SIVmac239_Env_Peptide7         | MVNETSSCIAQDNCT  | gp41           | SIVmac239_Env_Peptide45        | TLLAGIVQQQQQLLD  |
| V1V2           | SIVmac239_Env_Peptide8         | SSCIAQDNCTGLEQE  | gp41           | SIVmac239_Env_Peptide46        | IVQQQQQLLDVVKRQ  |
| V1V2           | SIVmac239_Env_Peptide9         | QDNCTGLEQEQMISC  | gp41           | SIVmac239_Env_Peptide47        | QQLLDVVKRQQELLR  |
| V1V2           | SIVmac239_Env_Peptide10        | GLEQEQMISCKFNMT  | gp41           | SIVmac239_Env_Peptide48        | VVKRQQELLRLTVWG  |
| V1V2           | SIVmac239_Env_Peptide11        | QMISCKFNMTGLKRD  | gp41           | SIVmac239_Env_Peptide49        | QELLRLTVWGTKNLQ  |
| V1V2           | SIVmac239_Env_Peptide12        | KFNMTGLKRDKKKEY  | gp41           | SIVmac239_Env_Peptide50        | LTVWGTKNLQTRVTA  |
| V1V2           | SIVmac239_Env_Peptide13        | GLKRDKKKEYNETWY  | gp41           | SIVmac239_Env_Peptide51        | TKNLQTRVTAIEKYL  |
| V1V2           | SIVmac239_Env_Peptide14        | KKKEYNETWYSADLV  | gp41           | SIVmac239_Env_Peptide52        | TRVTAIEKYLKDQAQ  |
| V1V2           | SIVmac239_Env_Peptide15        | NETWYSADLVCEQGN  | gp41           | SIVmac239_Env_Peptide53        | IEKYLKDQAQLNAWG  |
| V1V2           | SIVmac239_Env_Peptide16        | SADLVCEQGNNTGNE  | gp41           | SIVmac239_Env_Peptide54        | KDQAQLNAWGCAFRQ  |
| V1V2           | SIVmac239_Env_Peptide17        | CEQGNNTGNESRCYM  | gp41           | SIVmac239_Env_Peptide55        | LNAWGCAFRQVCHTT  |
| V1V2           | SIVmac239_Env_Peptide18        | NTGNESRCYMNHCNT  | gp41           | SIVmac239_Env_Peptide56        | CAFRQVCHTTVPWPN  |
| V3             | SIVmac239_Env_Peptide19        | RRPGNKTVLPVTIMS  | gp41           | SIVmac239_Env_Peptide57        | VCHTTVPWPNASLTP  |
| V3             | SIVmac239_Env_Peptide20        | KTVLPVTIMSGLVFH  | gp41           | SIVmac239_Env_Peptide58        | VPWPNASLTPKWNNE  |
| V3             | SIVmac239_Env_Peptide21        | VTIMSGLVFHSQPIN  | gp41           | SIVmac239_Env_Peptide59        | ASLTPKWNNETWQEW  |
| V3             | SIVmac239_Env_Peptide22        | GLVFHSQPINDRPKQ  | gp41           | SIVmac239_Env_Peptide60        | KWNNETWQEWERKVD  |
| V3             | SIVmac239_Env_Peptide23        | SQPINDRPKQAWCWF  | gp41           | SIVmac239_Env_Peptide61        | TWQEWERKVDFFLEEN |
| V4             | SIVmac239_Env_Peptide24        | KMNWFLNWVEDRNTA  | gp41           | SIVmac239_Env_Peptide62        | ERKVDFFLEENITALL |
| V4             | SIVmac239_Env_Peptide25        | LNWVEDRNTANQKPK  | gp41           | SIVmac239_Env_Peptide63        | FLEENITALLEEAQI  |
| V4             | SIVmac239_Env_Peptide26        | DRNTANQKPKQEQHQR | gp41           | SIVmac239_Env_Peptide64        | ITALLEEAQIQQEKN  |
| V4             | SIVmac239_Env_Peptide27        | NQKPKQEQHKRNYVPC | gp41           | SIVmac239_Env_Peptide65        | EEAQIQQEKNMYELQ  |
| V5             | SIVmac239_Env_Peptide28        | WIDGNQ           | gp41           | SIVmac239_Env_Peptide66        | QQEKNMYELQKLNSW  |
| C3             | SIVmac239_Env_Peptide29        | CWFGGKWKDAIKEVK  | gp41           | SIVmac239_Env_Peptide67        | MYELQKLNSWDVFGN  |
| C3             | SIVmac239_Env_Peptide30        | KWKDAIKEVKQTIVK  | gp41           | SIVmac239_Env_Peptide68        | KLNSWDVFGNWFDLA  |
| C3             | SIVmac239_Env_Peptide31        | IKEVKQTIVKHPRYT  | gp41           | SIVmac239_Env_Peptide69        | DVFGNWFDLASWI    |
| C3             | SIVmac239_Env_Peptide32        | QTIVKHPRYTGTNNT  |                |                                |                  |
| C3             | SIVmac239_Env_Peptide33        | HPRYTGTNNTDKINL  |                |                                |                  |
| C3             | SIVmac239_Env_Peptide34        | GTNNTDKINLTAPGG  |                |                                |                  |
| C3             | SIVmac239_Env_Peptide35        | DKINLTAPGGGDPEV  |                |                                |                  |
| C3             | SIVmac239_Env_Peptide36        | TAPGGGDPEVTFMWT  |                |                                |                  |
| C3             | SIVmac239_Env_Peptide37        | GDPEVTFMWTNCRGE  |                |                                |                  |
| C3             | SIVmac239_Env_Peptide38        | TFMWTNCRGEFLYCK  |                |                                |                  |

**Supplementary Table 3. Cryo-EM data and atomic model statistics.**

|                                                  | <b>SIVmac239.K180S<br/>SOSIP + K11 IgG, C3<br/>(Cryo-EM)</b> | <b>SIVmac239.K180S<br/>SOSIP + K11 IgG, C1<br/>(Cryo-EM)</b> |
|--------------------------------------------------|--------------------------------------------------------------|--------------------------------------------------------------|
|                                                  | <b>EMDB: EMD-25621)</b>                                      | <b>EMDB: EMD-25676</b>                                       |
|                                                  | <b>PDB ID: 7T2P</b>                                          | <b>PDB ID: 7T4G</b>                                          |
| <b>Data Collection and Processing</b>            |                                                              |                                                              |
| Electron microscope                              | Titon Krios                                                  | Titon Krios                                                  |
| Electron detector                                | K2 Summit                                                    | K2 Summit                                                    |
| Magnification                                    | 36,000                                                       | 36,000                                                       |
| Voltage (kV)                                     | 200                                                          | 200                                                          |
| Electron exposure (e-/Å <sup>2</sup> )           | 5                                                            | 5                                                            |
| Defocus range (µm)                               |                                                              |                                                              |
| Pixel Size (Å)                                   | 1.15                                                         | 1.15                                                         |
| Symmetry imposed                                 | C3                                                           | C1                                                           |
| Initial particle images (no.)                    | 278,151                                                      | 278,151                                                      |
| Final particle images (no.)                      | 177,365                                                      | 86,479                                                       |
| Map resolution (Å)                               | 3.47                                                         | 3.67                                                         |
| FSC threshold                                    | 0.143                                                        | 0.143                                                        |
| Map sharpening <i>B</i> factor (Å <sup>2</sup> ) | 101.8                                                        | 127.3                                                        |
| <b>Model building and refinement</b>             |                                                              |                                                              |
| Initial models used                              | (6TYB,6X9V)                                                  | C1 Map                                                       |
| Model composition                                |                                                              |                                                              |
| Protein Chains                                   | 4                                                            | 12                                                           |
| Protein Residues                                 | 873                                                          | 2619                                                         |
| Ligands                                          | 56                                                           | 176                                                          |
| R.m.s. deviations                                |                                                              |                                                              |
| Bond Lengths (Å)                                 | 0.021                                                        | 0.021                                                        |
| Bond angles (°)                                  | 1.816                                                        | 1.771                                                        |
| Ramachandran plot                                |                                                              |                                                              |
| Favored (%)                                      | 95.49                                                        | 95.8                                                         |
| Disallowed (%)                                   | 1.39                                                         | 1.35                                                         |
| Validation                                       |                                                              |                                                              |
| MolProbity score                                 | 1.09                                                         | 1.12                                                         |
| Clashscore                                       | 0.93                                                         | 1.17                                                         |
| Poor rotamers (%)                                | 0.39                                                         | 0.26                                                         |
| EMRinger score                                   | 2.06                                                         | 1.87                                                         |
| Map-model cross correlation                      | 0.79                                                         | 0.82                                                         |
| CaBLAM outliers (%)                              | 0.12                                                         | 3.66                                                         |



**Supplementary Table 4. Genetic background of animals in the challenge study.**

| <b>Group</b>   | <b>ID</b> | <b>Sex</b> | <b>MHC</b> | <b>Age (years)</b> |
|----------------|-----------|------------|------------|--------------------|
| Group 1 5L7-LS | rh2967    | female     | A*02-      | 4.88               |
| Group 1 5L7-LS | r17107    | male       | A*02+      | 3.30               |
| Group 1 5L7-LS | r18011    | female     | A*02+      | 2.96               |
| Group 1 5L7-LS | r18025    | male       | A*02-      | 2.83               |
| Group 1 5L7-LS | r18044    | male       | A*02+      | 2.72               |
| Group 1 5L7-LS | rh2962    | female     | A*02-      | 3.67               |
| Group 2 K11    | r17034    | male       | A*02-      | 3.75               |
| Group 2 K11    | r17041    | female     | A*02-      | 3.71               |
| Group 2 K11    | r17075    | female     | A*02-      | 3.45               |
| Group 2 K11    | r18014    | male       | A*02-      | 2.93               |
| Group 2 K11    | r18022    | male       | A*02+      | 2.88               |
| Group 2 K11    | rh2961    | female     | A*02-      | 4.82               |
| Group 3        | r17068    | male       | A*02-      | 3.55               |
| Group 3        | r17024    | male       | A*02-      | 3.79               |
| Group 3        | r17035    | male       | A*02-      | 3.75               |
| Group 3        | r17060    | male       | A*02+      | 3.59               |
| Group 3        | r18017    | male       | A*02+      | 2.92               |
| Group 3        | rh2751    | female     | A*02-      | 5.78               |
