# Supplementary material
Source: PubMed Central journal article supplement (PMC9448735)
Supplement: 41467_2022_32783_MOESM3_ESM.pdf [file 41467_2022_32783_MOESM3_ESM.pdf]

## Description of Additional Supplementary Information

**Title:** Supplemental Movie 1.

**Description:** CryoSparrc 3-D variability analysis of SIVmac239 SOSIP trimer. Map morphs showing heterogeneity associated with the first two eigenvectors viewed from the side and top of the SIVmac239 SOSIP trimer.
