# Supplementary material
Source: PubMed Central journal article supplement (PMC9448735)
Supplement: 41467_2022_32783_MOESM5_ESM.pdf [file 41467_2022_32783_MOESM5_ESM.pdf]

## Reporting Summary

Nature Portfolio wishes to improve the reproducibility of the work that we publish. This form provides structure for consistency and transparency in reporting. For further information on Nature Portfolio policies, see our [Editorial Policies](#) and the [Editorial Policy Checklist](#).

### Statistics

For all statistical analyses, confirm that the following items are present in the figure legend, table legend, main text, or Methods section.

n/a Confirmed

- |                                     |                                     |                                                                                                                                                                                                                                                            |
|-------------------------------------|-------------------------------------|------------------------------------------------------------------------------------------------------------------------------------------------------------------------------------------------------------------------------------------------------------|
| <input type="checkbox"/>            | <input checked="" type="checkbox"/> | The exact sample size ( $n$ ) for each experimental group/condition, given as a discrete number and unit of measurement                                                                                                                                    |
| <input type="checkbox"/>            | <input checked="" type="checkbox"/> | A statement on whether measurements were taken from distinct samples or whether the same sample was measured repeatedly                                                                                                                                    |
| <input type="checkbox"/>            | <input checked="" type="checkbox"/> | The statistical test(s) used AND whether they are one- or two-sided<br><i>Only common tests should be described solely by name; describe more complex techniques in the Methods section.</i>                                                               |
| <input checked="" type="checkbox"/> | <input type="checkbox"/>            | A description of all covariates tested                                                                                                                                                                                                                     |
| <input checked="" type="checkbox"/> | <input type="checkbox"/>            | A description of any assumptions or corrections, such as tests of normality and adjustment for multiple comparisons                                                                                                                                        |
| <input type="checkbox"/>            | <input checked="" type="checkbox"/> | A full description of the statistical parameters including central tendency (e.g. means) or other basic estimates (e.g. regression coefficient) AND variation (e.g. standard deviation) or associated estimates of uncertainty (e.g. confidence intervals) |
| <input type="checkbox"/>            | <input checked="" type="checkbox"/> | For null hypothesis testing, the test statistic (e.g. $F$ , $t$ , $r$ ) with confidence intervals, effect sizes, degrees of freedom and $P$ value noted<br><i>Give <math>P</math> values as exact values whenever suitable.</i>                            |
| <input checked="" type="checkbox"/> | <input type="checkbox"/>            | For Bayesian analysis, information on the choice of priors and Markov chain Monte Carlo settings                                                                                                                                                           |
| <input checked="" type="checkbox"/> | <input type="checkbox"/>            | For hierarchical and complex designs, identification of the appropriate level for tests and full reporting of outcomes                                                                                                                                     |
| <input checked="" type="checkbox"/> | <input type="checkbox"/>            | Estimates of effect sizes (e.g. Cohen's $d$ , Pearson's $r$ ), indicating how they were calculated                                                                                                                                                         |

*Our web collection on [statistics for biologists](#) contains articles on many of the points above.*

### Software and code

Policy information about [availability of computer code](#)

Data collection Negative stain EM and Cryo-EM data collection was performed using the Legion software package; All movie micrographs were aligned and dose-weighted using MotionCor2 and CTF parameters were estimated with GCTF. Single-particle processing was carried out using CryoSparc2.

Data analysis All single-particle data processing steps were performed with either CryoSparc2 (CryoEM) or Relion/3.0 (nsEM). Model building was performed using SWISS-MODEL, SAbPred, COOT, and Rosetta.

For manuscripts utilizing custom algorithms or software that are central to the research but not yet described in published literature, software must be made available to editors and reviewers. We strongly encourage code deposition in a community repository (e.g. GitHub). See the Nature Portfolio [guidelines for submitting code & software](#) for further information.

### Data

Policy information about [availability of data](#)

All manuscripts must include a [data availability statement](#). This statement should provide the following information, where applicable:

- Accession codes, unique identifiers, or web links for publicly available datasets
- A description of any restrictions on data availability
- For clinical datasets or third party data, please ensure that the statement adheres to our [policy](#)

Antibody sequences are available on Genbank (ON526845-ON526868). Cryo-EM and nsEM structures and refined atomic models have been deposited to the Electron Microscopy Data Bank under accession codes EMD-25621, EMD-25676, EMD-25623, EMD-25624, EMD-25625, EMD-25626, EMD-25627, EMD-25628, EMD-25629, EMD-25630, EMD-25631, and EMD-25632, and the Protein Data Bank under accession codes 7T2P and 7T4G.

## Field-specific reporting

Please select the one below that is the best fit for your research. If you are not sure, read the appropriate sections before making your selection.

Life sciences  Behavioural & social sciences  Ecological, evolutionary & environmental sciences

For a reference copy of the document with all sections, see [nature.com/documents/nr-reporting-summary-flat.pdf](https://www.nature.com/documents/nr-reporting-summary-flat.pdf)

## Life sciences study design

All studies must disclose on these points even when the disclosure is negative.

|                 |                                                                                                                                                                                                                                                                                                                                 |
|-----------------|---------------------------------------------------------------------------------------------------------------------------------------------------------------------------------------------------------------------------------------------------------------------------------------------------------------------------------|
| Sample size     | The challenge study consisted of three groups of rhesus macaques with 6 animals per group. Based on our experience with SIV in rhesus macaques, this sample size provides power to determine differences in protective efficacy of antibody administered group compared with the control group.                                 |
| Data exclusions | One animal was excluded in the survival analysis. This animal was mistakenly detected as having detectable viral load after fourth challenge and was therefore not subjected to additional challenges. However, its viral load was undetectable since then, and the viral load repeat for the infection timepoint was negative. |
| Replication     | Virologic and serological measures were performed in duplicate. Technical replicates were minimally different.                                                                                                                                                                                                                  |
| Randomization   | The animals were balanced for age and gender and otherwise randomized into allocation groups.                                                                                                                                                                                                                                   |
| Blinding        | The viral load measurement and serological measure were performed blinded.                                                                                                                                                                                                                                                      |

## Reporting for specific materials, systems and methods

We require information from authors about some types of materials, experimental systems and methods used in many studies. Here, indicate whether each material, system or method listed is relevant to your study. If you are not sure if a list item applies to your research, read the appropriate section before selecting a response.

### Materials & experimental systems

| n/a                                 | Involved in the study                                           |
|-------------------------------------|-----------------------------------------------------------------|
| <input type="checkbox"/>            | <input checked="" type="checkbox"/> Antibodies                  |
| <input type="checkbox"/>            | <input checked="" type="checkbox"/> Eukaryotic cell lines       |
| <input checked="" type="checkbox"/> | <input type="checkbox"/> Palaeontology and archaeology          |
| <input type="checkbox"/>            | <input checked="" type="checkbox"/> Animals and other organisms |
| <input checked="" type="checkbox"/> | <input type="checkbox"/> Human research participants            |
| <input checked="" type="checkbox"/> | <input type="checkbox"/> Clinical data                          |
| <input checked="" type="checkbox"/> | <input type="checkbox"/> Dual use research of concern           |

### Methods

| n/a                                 | Involved in the study                              |
|-------------------------------------|----------------------------------------------------|
| <input checked="" type="checkbox"/> | <input type="checkbox"/> ChIP-seq                  |
| <input type="checkbox"/>            | <input checked="" type="checkbox"/> Flow cytometry |
| <input checked="" type="checkbox"/> | <input type="checkbox"/> MRI-based neuroimaging    |

## Antibodies

|                 |                                                                                                                                                                                                                                                                                                                                                                                                                                                                                                                                                                                                                                                                                                                                                                                                                                                                                                                                                                           |
|-----------------|---------------------------------------------------------------------------------------------------------------------------------------------------------------------------------------------------------------------------------------------------------------------------------------------------------------------------------------------------------------------------------------------------------------------------------------------------------------------------------------------------------------------------------------------------------------------------------------------------------------------------------------------------------------------------------------------------------------------------------------------------------------------------------------------------------------------------------------------------------------------------------------------------------------------------------------------------------------------------|
| Antibodies used | APC-Cy7 mouse anti-human CD3 (clone SP34-2; BD Biosciences; Cat#557757); APC-Cy7 mouse anti-human CD4 (clone OKT4; Biolegend; Cat#317418); APC-Cy7 mouse anti-human CD8 (clone RPA-T8; BD Biosciences; Cat#557760); APC-Cy7 mouse anti-human CD14 (clone M5E2; BD Biosciences; Cat#561384); PerCP/Cy5.5 mouse anti-human CD20 (clone 2H7; Biolegend; Cat#302326); BV421 mouse anti-human IgG (clone G18-145; BD Biosciences; Cat#562581); PE mouse anti-human IgM (clone MHM-88; Biolegend; Cat#314508); Goat anti monkey IgG (H+L) (BioRad; Cat#AAI42); Alkaline phosphatase-conjugated goat anti-human IgG Fcy antibody (Jackson ImmunoResearch; Cat#109-055-190); 6x His tag monoclonal antibody (Invitrogen; Cat#MA1-21315); CD4-IgG2 (Progenics; Cat#PRO542); Mouse anti-rhodopsin (C9) monoclonal antibody (EMD Millipore, Cat#6B9575); 6x His tag monoclonal antibody (Invitrogen, Cat#MA1-21315); Goat anti-human IgG-HRP antibody (SouthernBiotech, Cat#2045-05) |
| Validation      | All mAbs used according to manufacturer's instructions and/or previously published methods.                                                                                                                                                                                                                                                                                                                                                                                                                                                                                                                                                                                                                                                                                                                                                                                                                                                                               |

## Eukaryotic cell lines

Policy information about [cell lines](#)

|                     |                                                                                                                                                                                              |
|---------------------|----------------------------------------------------------------------------------------------------------------------------------------------------------------------------------------------|
| Cell line source(s) | TZM-bl cells (NIH AIDS Reagent Program); HEK293T cells (ATCC); FreeStyle HEK293 cells (ThermoFisher); Expi293F cells (ThermoFisher); Irradiated 3T3msCD40L cells (NIH); HEK293S cells (ATCC) |
| Authentication      | Commercially purchased                                                                                                                                                                       |

|                                                                      |                                                                          |
|----------------------------------------------------------------------|--------------------------------------------------------------------------|
| Mycoplasma contamination                                             | All cell lines were tested <b>negative</b> for mycoplasma contamination. |
| Commonly misidentified lines<br>(See <a href="#">ICLAC</a> register) | No commonly misidentified cell lines were <b>used in</b> the study.      |

## Animals and other organisms

Policy information about [studies involving animals](#); [ARRIVE guidelines](#) recommended for reporting animal research

|                         |                                                                                                                                                                                                             |
|-------------------------|-------------------------------------------------------------------------------------------------------------------------------------------------------------------------------------------------------------|
| Laboratory animals      | 18 Indian-origin rhesus macaques ( <i>Macaca mulatta</i> ) between 2- to 6-year-old were used (11 males and 7 females) in the antibody-mediated protection study.                                           |
| Wild animals            | No wild animals were used <b>in</b> the study.                                                                                                                                                              |
| Field-collected samples | No field collected samples were used <b>in</b> the study.                                                                                                                                                   |
| Ethics oversight        | All procedures were <b>previously approved</b> by the University of Wisconsin Graduate School Animal Care and Use Committee (animal welfare assurance number 16-00239 [A3368-01]; protocol number G005248). |

Note that full information on the approval of the study protocol must also be provided in the manuscript.

## Flow Cytometry

### Plots

Confirm that:

- The axis labels state the marker and fluorochrome used (e.g. CD4-FITC).
- The axis scales are clearly visible. Include numbers along axes only for bottom left plot of group (a 'group' is an analysis of identical markers).
- All plots are contour plots with outliers or pseudocolor plots.
- A numerical value for number of cells or percentage (with statistics) is provided.

### Methodology

|                           |                                                                                                                                                                              |
|---------------------------|------------------------------------------------------------------------------------------------------------------------------------------------------------------------------|
| Sample preparation        | Cryopreserved rhesus peripheral blood mononuclear cells were thawed, washed, and stained for FACS sorting                                                                    |
| Instrument                | BD FACSMelody or BD FACSFusion was used for cell sorting                                                                                                                     |
| Software                  | Flow cytometric data was analyzed using FlowJo (v10.7.1), index-sort was analyzed using Prism 9.0                                                                            |
| Cell population abundance | A total of 8470 antigen-specific memory B cells were single-cell sorted and expanded <b>in vitro</b>                                                                         |
| Gating strategy           | After <b>gating for lymphocyte</b> (FSC-A/SSC-A) singlets (FSC-H/FSC-W, SSC-H/SSC-W), CD3-CD4-CD8-CD14-CD20+IgM-IgG+ antigen-specific memory B cells were single-cell sorted |

- Tick this box to confirm that a figure exemplifying the gating strategy is provided in the Supplementary Information.
